# Supplementary material for: The origin of introns and their role in eukaryogenesis: a compromise solution to the introns-early versus introns-late debate?
Source: Springer Nature journal article supplement (doi:10.1186/1745-6150-1-22), 2006-01-01

Intron density  
(introns/gene)

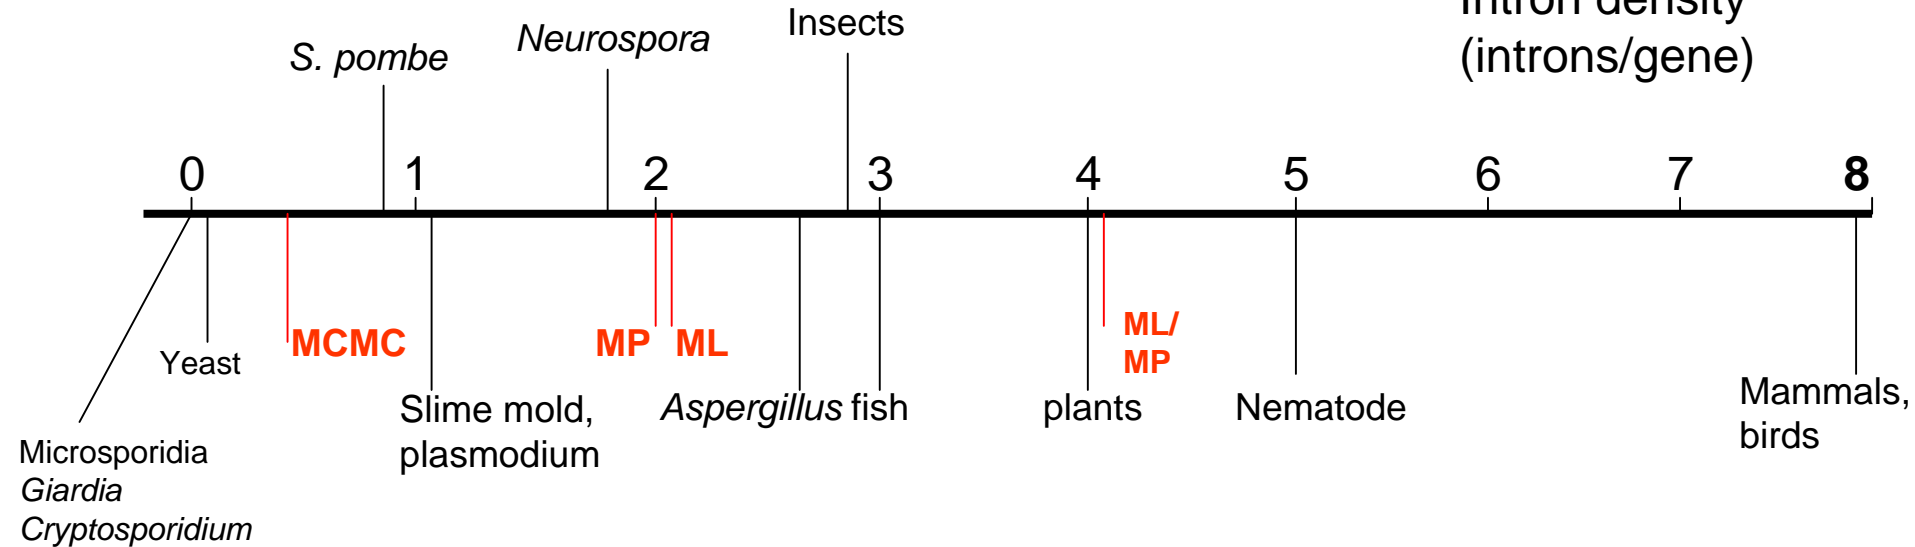

Supplement: 13062_2006_22_MOESM1_ESM.pdf [file 13062_2006_22_MOESM1_ESM.pdf]
